# Supplementary material for: Influence of anionic sulfonate-containing co-ligands on the solid structures of silver complexes supported by 4,4′-bipyridine bridges
Source: Royal Society of Chemistry journal article supplement (doi:10.1039/b806195e), 2008-01-01
Supplement: b806195e.pdf [file b806195e.pdf]

## Supporting Information

### **Influence of Sulfonate Anions on the Solid-structures of Silver Complexes Supported by 4,4'-Bipyridine Bridge**

Hua Wu, Xian-Wu Dong, Hai-Yan Liu, Jian-Fang Ma\*, Shun-Li Li, Jin Yang,  
Ying-Ying Liu and Zhong-Min Su

*Key Lab of Polyoxometalate Science, Department of Chemistry,  
Northeast Normal University, Changchun 130024, People's Republic of  
China*

\* Corresponding author.

E-mail: jianfangma@yahoo.com.cn

Table S1. Hydrogen-bond geometries for compounds **1–10** (Å, °)

| D–H···A            | D–H<br>[Å] | H···A<br>[Å] | D···A<br>[Å] | <D–H···A<br>[°] |
|--------------------|------------|--------------|--------------|-----------------|
| <b>Compound 1</b>  |            |              |              |                 |
| OW1-H(1B)...O(1)#3 | 0.81(3)    | 2.03(2)      | 2.813(3)     | 165(3)          |
| OW1-H(1A)...O(3)   | 0.82(2)    | 2.07(2)      | 2.838(3)     | 154(3)          |
| N(4)-HN2...OW1#4   | 0.85(3)    | 2.17(3)      | 2.985(4)     | 160(3)          |
| <b>Compound 2</b>  |            |              |              |                 |
| OW2-HW2B...O(3)#3  | 0.84(4)    | 2.02(5)      | 2.858(9)     | 177(10)         |
| OW1-HW1A...O(1)    | 0.78(4)    | 2.27(6)      | 3.027(9)     | 165(15)         |
| OW1-HW1B...OW2#4   | 0.84(4)    | 2.14(5)      | 2.965(10)    | 168(11)         |
| <b>Compound 3</b>  |            |              |              |                 |
| OW2-HW2B...O(2)#5  | 0.846(10)  | 1.991(10)    | 2.825(3)     | 169(2)          |
| OW2-HW2A...OW1     | 0.842(10)  | 1.932(10)    | 2.770(3)     | 173(2)          |
| OW1-HW1A...O(4)#6  | 0.851(10)  | 1.884(14)    | 2.689(4)     | 157(3)          |
| O(5)-H(7A)...O(3)  | 0.84(3)    | 1.67(4)      | 2.454(4)     | 153(4)          |
| OW1-HW1B...O(1)#7  | 0.852(10)  | 1.956(15)    | 2.752(4)     | 155(3)          |
| <b>Compound 4</b>  |            |              |              |                 |
| OW1-HW1B...O(2)#3  | 0.85(3)    | 1.87(3)      | 2.681(4)     | 160(4)          |
| OW1-HW1A...O(3)#4  | 0.79(3)    | 1.98(4)      | 2.770(4)     | 175(5)          |
| N(1)-HN1...OW1#5   | 0.94(4)    | 2.04(4)      | 2.984(5)     | 173(3)          |
| <b>Compound 6</b>  |            |              |              |                 |
| N(3)-HN3B...O(1)#4 | 0.84(4)    | 2.13(4)      | 2.977(8)     | 175(7)          |
| <b>Compound 7</b>  |            |              |              |                 |
| OW1-HW1...O(1)     | 0.869(10)  | 2.024(11)    | 2.887(3)     | 172(3)          |
| OW1-HW2...O(1)#2   | 0.872(10)  | 2.051(10)    | 2.920(3)     | 175(3)          |
| <b>Compound 8</b>  |            |              |              |                 |
| OW1-HW2...O(3)#4   | 0.79(3)    | 2.02(4)      | 2.798(5)     | 170(6)          |
| OW1-HW1...O(5)#5   | 0.83(4)    | 1.99(4)      | 2.795(4)     | 163(5)          |

|                  |         |         |          |        |
|------------------|---------|---------|----------|--------|
| OW2-HW4...O(4)#3 | 0.85(4) | 2.22(4) | 2.986(5) | 149(6) |
| OW2-HW3...O(2)   | 0.82(4) | 2.10(4) | 2.886(5) | 160(6) |

Compound **9**

|                   |         |         |           |         |
|-------------------|---------|---------|-----------|---------|
| OW1-HW1A...O(1)#5 | 0.81(5) | 2.07(5) | 2.872(11) | 169(13) |
| OW2-HW2A...O(5)#6 | 0.86(5) | 2.00(5) | 2.858(13) | 171(10) |
| OW2-HW2B...O(4)#7 | 0.85(5) | 2.00(5) | 2.848(13) | 174(14) |
| OW1-HW1B...O(3)   | 0.83(5) | 2.18(5) | 3.000(11) | 170(13) |

Compound **10**

|                    |         |         |          |         |
|--------------------|---------|---------|----------|---------|
| OW2-H(2A)...O(5)#3 | 0.96(5) | 1.87(5) | 2.794(5) | 160(9)  |
| OW2-H(2B)...O(7)   | 0.83(5) | 2.10(9) | 2.788(6) | 140(11) |
| OW3-H(3B)...O(2)   | 1.00(5) | 2.18(8) | 2.901(5) | 128(7)  |
| OW3-H(3A)...OW4    | 0.87(5) | 1.93(6) | 2.747(7) | 156(10) |
| OW6-H(6A)...O(4)#3 | 0.88(5) | 1.91(6) | 2.768(6) | 163(10) |
| OW6-H(6B)...O(8)   | 0.88(5) | 2.03(6) | 2.853(6) | 154(10) |

---

[a] Symmetry operations: for **1**: #3  $-x + 1, -y + 1, -z$ ; #4  $-x + 1, -y + 1, -z + 1$ ; for **2**: #1  $x, y, z + 1$ ; #2  $x, y, z - 1$ ; #3  $-x + 5/4, y + 1/4, z + 1/4$ ; #4  $-x + 3/2, -y + 3/2, z$ ; for **3**: #1  $x - 1, y, z - 1$ ; #2  $-x, -y + 1, -z$ ; #3  $x + 1, y, z + 1$ ; #4  $x, -y + 1/2, z$ ; #5  $x - 1, y, z + 1$ ; #6  $x - 1, y, z$ ; #7  $x, y, z + 1$ ; for **4**: #1  $x - 1, y, z - 1$ ; #2  $x + 1, y, z + 1$ ; #3  $x, y - 1, z$ ; #4  $-x, -y + 1, -z$ ; #5  $-x + 1, -y + 1, -z + 1$ ; for **6**: #1  $x - 1/2, -y + 1/2, z - 1/2$ ; #2  $-x, -y + 1, -z + 2$ ; #3  $x + 1/2, -y + 1/2, z + 1/2$ ; #4  $-x + 1/2, y + 1/2, -z + 1/2$ ; for **7**: #1  $-x, y, -z + 1/2$ ; #2  $-x + 2, -y + 1, -z + 2$ ; for **8**: #1  $x - 1, y + 1, z$ ; #2  $-x - 1, -y + 2, -z + 2$ ; #3  $x + 1, y - 1, z$ ; #4  $x - 1, y, z$ ; #5  $-x, -y + 1, -z + 2$ ; for **9**: #1  $x, y - 1, z$ ; #2  $x, y + 1, z$ ; #3  $-x + 1, -y + 1, -z + 2$ ; #4  $-x, -y + 1, -z$ ; #5  $-x, -y + 1, -z + 1$ ; #6  $-x + 1, y - 1/2, -z + 3/2$ ; #7  $x, -y + 1/2, z + 1/2$ ; for **10**: #1  $x - 1/2, -y + 3/2, z - 1/2$ ; #2  $x + 1/2, -y + 3/2, z + 1/2$ ; #3  $x - 1, y, z$ ; #4  $x + 1, -y + 1, z - 1/2$ .

Table S2. Selected Bond Lengths [Å] and Angles [deg] for **1–10**.<sup>[a]</sup>

| Compound 1          |            |                   |            |
|---------------------|------------|-------------------|------------|
| Ag(1)-N(2)#1        | 2.166(2)   | Ag(1)-N(1)        | 2.188(2)   |
| Ag(1)-N(4)          | 2.550(2)   | N(2)#1-Ag(1)-N(1) | 161.25(8)  |
| N(2)#1-Ag(1)-N(4)   | 107.98(8)  | N(1)-Ag(1)-N(4)   | 90.23(8)   |
| Compound 2          |            |                   |            |
| Ag(1)-N(1)          | 2.132(8)   | Ag(1)-N(2)#1      | 2.169(8)   |
| N(1)-Ag(1)-N(2)#1   | 179.4(2)   |                   |            |
| Compound 3          |            |                   |            |
| Ag(1)-N(2)          | 2.154(2)   | Ag(1)-N(1)#1      | 2.154(1)   |
| Ag(1)-Ag(1)#3       | 3.3323(9)  | N(2)-Ag(1)-N(1)#1 | 173.37(7)  |
| Ag(1)-OW(2)#2       | 2.681(3)   |                   |            |
| Compound 4          |            |                   |            |
| Ag(1)-N(2)          | 2.184(2)   | Ag(1)-N(3)#1      | 2.188(2)   |
| Ag(1)-O(1)          | 2.70(2)    | Ag(1)-O(1)#2      | 2.64(1)    |
| N(2)-Ag(1)-N(3)#1   | 165.95(10) |                   |            |
| Compound 5          |            |                   |            |
| Ag(1)-N(2)          | 2.195(3)   | Ag(1)-N(3)#1      | 2.199(3)   |
| Ag(1)-O(1)          | 2.576(3)   | Ag(1)-O(1)#2      | 2.586(3)   |
| N(2)-Ag(1)-N(3)#1   | 166.5(1)   | N(2)-Ag(1)-O(1)   | 95.8(1)    |
| N(3)#1-Ag(1)-O(1)   | 91.0(1)    | N(2)-Ag(1)-O(1)#2 | 91.1(1)    |
| N(3)#1-Ag(1)-O(1)#2 | 101.3(1)   | O(1)-Ag(1)-O(1)#2 | 83.2(1)    |
| Compound 6          |            |                   |            |
| Ag(1)-N(2)#1        | 2.181(4)   | Ag(1)-N(1)        | 2.181(4)   |
| Ag(1)-O(2)          | 2.833(9)   | Ag(1)-O(2)#4      | 2.833(9)   |
| N(2)#1-Ag(1)-N(1)   | 166.7(2)   | O(2)-Ag(1)-O(2)#4 | 72.77(3)   |
| Compound 7          |            |                   |            |
| Ag(1)-N(3)          | 2.143(2)   | Ag(1)-N(3)#1      | 2.143(2)   |
| Ag(2)-N(2)          | 2.160(2)   | Ag(2)-N(1)        | 2.188(2)   |
| Ag(2)-O(4)          | 2.511(2)   | Ag(1)-O(2)#3      | 2.678(7)   |
| Ag(1)-O(2)#2        | 2.678(7)   | N(3)-Ag(1)-N(3)#1 | 173.0(1)   |
| N(2)-Ag(2)-N(1)     | 171.50(8)  | N(2)-Ag(2)-O(4)   | 106.64(8)  |
| N(1)-Ag(2)-O(4)     | 70.37(7)   | N(1)-Ag(2)-O(4)   | 70.37(7)   |
| Compound 8          |            |                   |            |
| Ag(1)-N(4)#1        | 2.160(2)   | Ag(1)-N(3)        | 2.170(3)   |
| Ag(1)-O(1)#2        | 2.67(4)    | Ag(2)-N(2)        | 2.195(3)   |
| Ag(2)-N(1)          | 2.205(3)   | Ag(2)-O(5)        | 2.512(3)   |
| Ag(2)-OW1           | 2.560(3)   | N(4)#1-Ag(1)-N(3) | 175.36(11) |
| N(2)-Ag(2)-N(1)     | 153.91(12) | N(2)-Ag(2)-O(5)   | 128.66(10) |
| N(1)-Ag(2)-O(5)     | 70.40(10)  | N(2)-Ag(2)-OW1    | 85.45(12)  |
| N(1)-Ag(2)-OW1      | 112.25(12) | O(5)-Ag(2)-OW1    | 96.52(11)  |

Compound **9**

|                   |          |                 |          |
|-------------------|----------|-----------------|----------|
| Ag(1)-N(4)#1      | 2.132(6) | Ag(1)-N(3)      | 2.171(8) |
| Ag(2)-N(1)        | 2.143(6) | Ag(2)-N(2)      | 2.177(8) |
| Ag(1)-O(3)#5      | 2.87(2)  | Ag(1)-OW2       | 2.71(3)  |
| Ag(2)-O(4)        | 2.83(2)  | Ag(2)-OW1       | 2.74(3)  |
| N(4)#1-Ag(1)-N(3) | 175.9(3) | N(1)-Ag(2)-N(2) | 175.9(3) |

Compound **10**

|                   |          |                   |          |
|-------------------|----------|-------------------|----------|
| Ag(1)-N(6)#1      | 2.141(5) | Ag(1)-N(5)        | 2.150(5) |
| Ag(2)-N(4)#2      | 2.164(5) | Ag(2)-N(3)        | 2.169(5) |
| Ag(3)-N(2)        | 2.151(5) | Ag(3)-N(1)#1      | 2.153(5) |
| Ag(1)-O(9)#3      | 2.789(3) | Ag(1)-O(6)        | 2.851(3) |
| Ag(3)-O(2)#4      | 2.784(4) | N(4)#2-Ag(2)-N(3) | 176.0(1) |
| N(6)#1-Ag(1)-N(5) | 178.3(2) | N(2)-Ag(3)-N(1)#1 | 174.0(2) |

[a] Symmetry operations: for **1**: #1  $x, y, z + 1$ ; for **2**: #1  $x, y, z + 1$ ; #2  $x, y, z - 1$ ; for **3**: #1  $x - 1, y, z - 1$ ; #2  $-x, -y + 1, -z$ ; #3  $-x, 1 - y, 2 - z$ ; for **4**: #1  $x - 1, y, z - 1$  #2  $-x, 1 - y, z$ ; for **5**: #1  $x, y + 1, z$ ; #2  $-x + 2, -y + 2, -z + 1$ ; for **6**: #1  $x - 1/2, -y + 1/2, z - 1/2$ ; #4  $1 - x, 1 - y, -z$ ; for **7**: #1  $-x, y, -z + 1/2$ ; #2  $1 - x, 1 - y, 1 - z$ ; #3  $x - 1, 1 - y, z + 1/2$ ; for **8**: #1  $x - 1, y + 1, z$ ; #2  $x + 1, y - 1, z$ ; for **9**: #1  $x, y - 1, z$ ; #5  $x, 1/2 - y, 1/2 + z$ ; for **10**: #1  $x - 1/2, -y + 3/2, z - 1/2$ ; #2  $x + 1/2, -y + 3/2, z + 1/2$ ; #3  $1.5 + x, y + 1/2, z$ ; #4  $x + 1/2, y + 1/2, z$ ; #5  $x, 1 - y, z + 0.5$ .

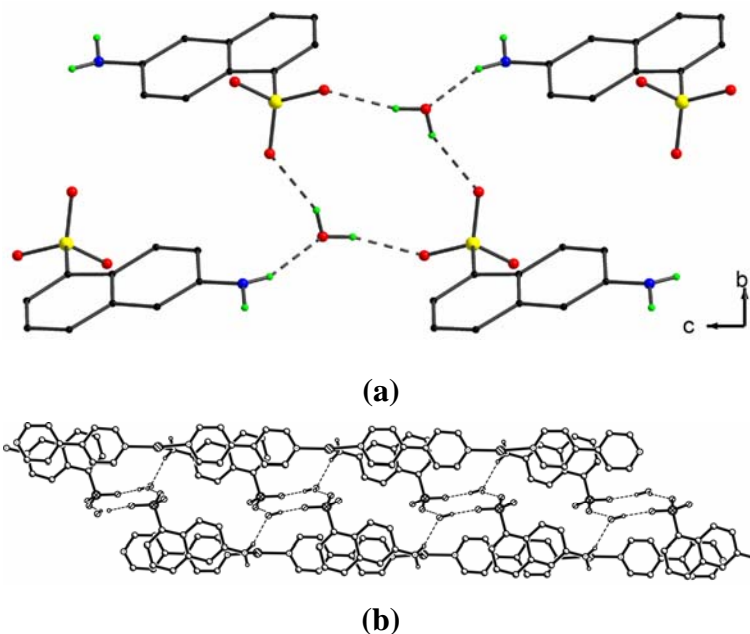

**Figure S1.** (a) The hydrogen-bonding ring in **1**. (b) A 1D double chain via hydrogen bonds in **1**.

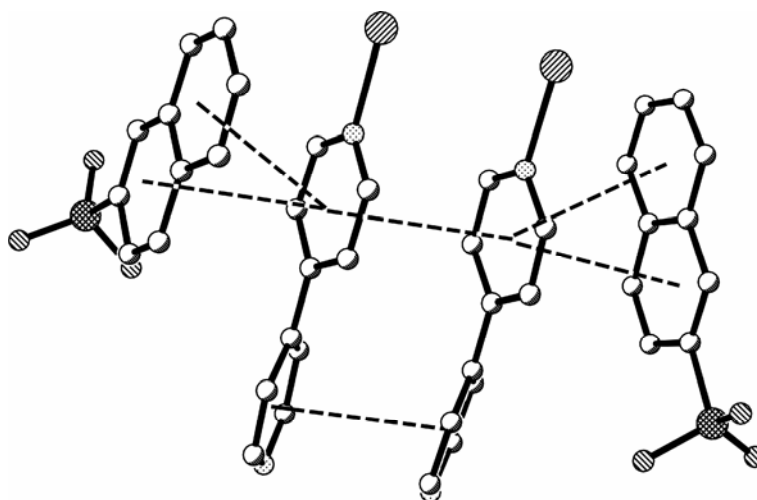

**Figure S2:** The  $\pi$ - $\pi$  stacking styles of **2**.

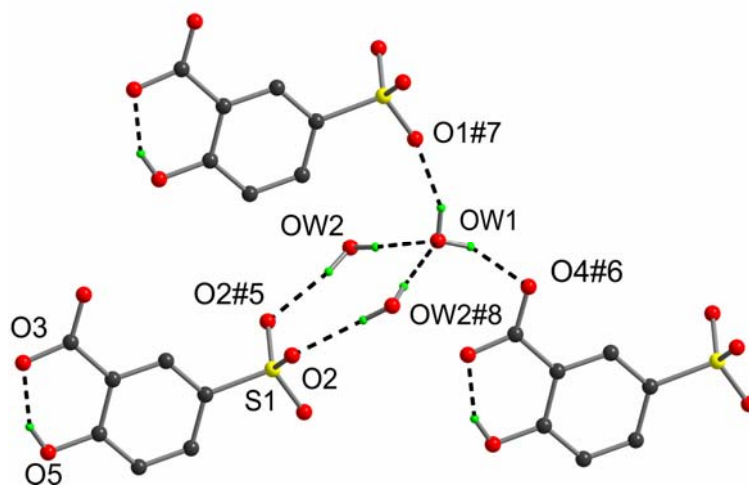

**Figure S3.** The hydrogen bonds in **3**.

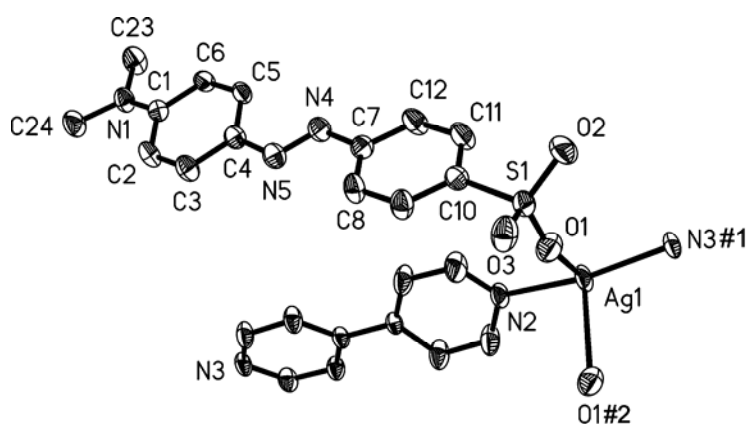

**(a)**

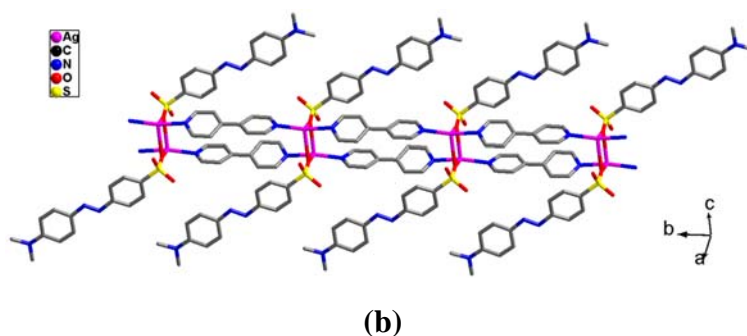

**Figure S4.** (a) ORTEP view of environment of the Ag(I) in **5** showing 30% thermal probability ellipsoids. (b) The double chain in **5**. In **5**, Each silver cation is four-coordinated by two nitrogen atoms from two bipy ligands, and two oxygen atoms from different sulfonate anions. The silver cations are bridged by bipy ligands to form a 1D infinite polymeric chain, and the chains are further bridged by sulfonate anions to form an infinite polymeric double chain as shown.

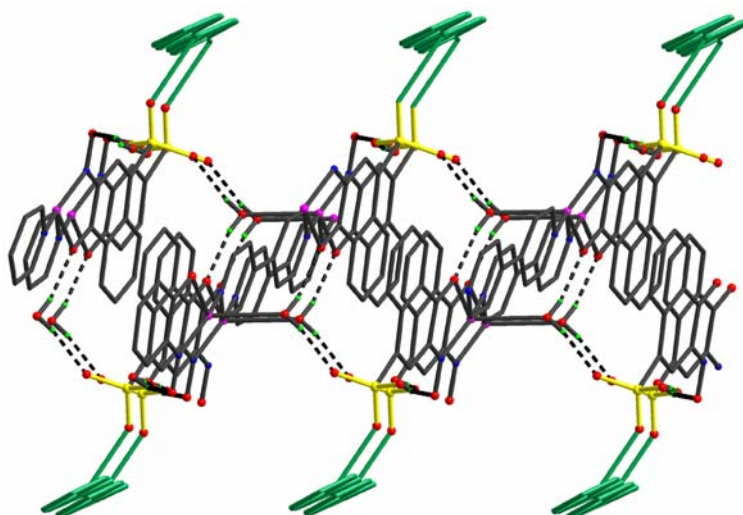

**Figure S5.** The 2D supramolecular layer through hydrogen bonds in **8**.

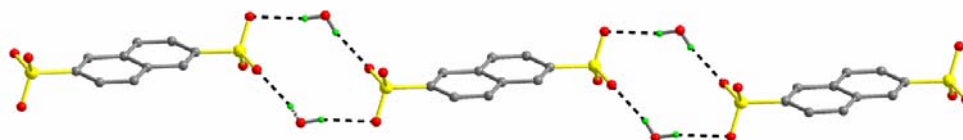

**Figure S6.** An anionic chain in **9** via hydrogen bonds. H bonds: dashed lines.

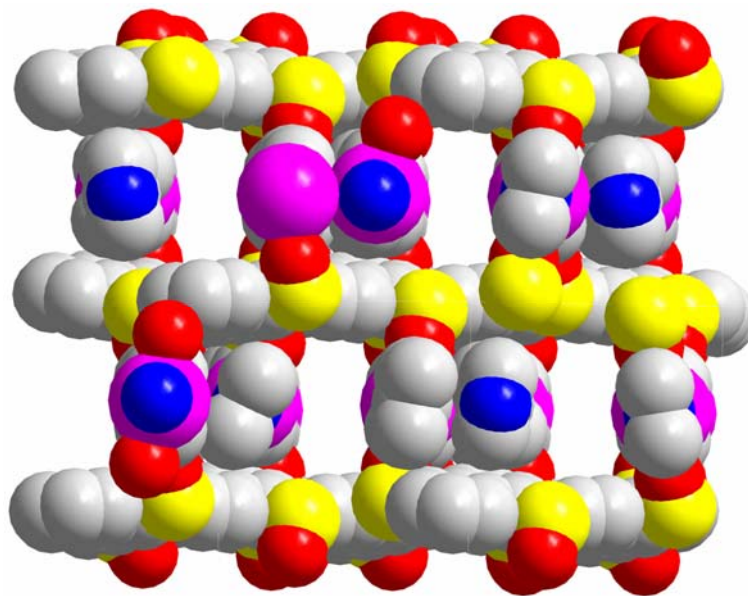

**Figure S7.** The three-dimensional porous framework with rectangle channels. The isolated Ag-bipy chains are omitted.
